# Supplementary material for: Tailored message interventions versus typical messages for increasing participation in colorectal cancer screening among a non-adherent population: A randomized controlled trial
Source: Springer Nature journal article supplement (doi:10.1186/s12889-016-3069-y), 2016-05-24
Supplement: MOESM1 [file 10195832]

# 尾道市大腸がん検診に関する意識調査

良い例 悪い例

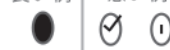

記入方法：黒色のペンまたは鉛筆で、○の中を正確に塗りつぶしてください。

**問 1** 大腸がん検診（便検査）の受診状況についてお聞きします。以下からあなたの状況に最も当てはまるものを 1つ選んで○を塗りつぶしてください。

過去一度も  
便検査を受けたことがない

○

過去に受けたことはあるが  
今年度（H22.4.1～）受けていない

○

今年度（H22.4.1～）に  
受けた

○

最後に受診したのは  
（ ）年（ ）ヶ月前

**問 2** 今後の大腸がん検診（便検査）の受診に対するお考えについてお聞きします。これから先、便検査を受けるつもりですか？以下から最も当てはまるものを 1つ選んで○を塗りつぶしてください。

この1年以内に受けるつもり  
はないし、これから先も  
ずっと受けるつもりはない

○

この1年以内に受けるつもり  
はないが、いつかは受けたい

○

この1年以内に必ず  
受けるつもりである

○

**問 3**  
へ進む

**問 3**  
へ進む

**問 2-1**  
へ進む

**問 2-1** 問2で「この1年以内に必ず受けるつもりである」と答えた方にお伺いします。

**A. 何月頃に大腸がん検診（便検査）を受けるか決めていますか？**

○ 決めている →（ ）月頃

○ 決めていない

**B. どこで大腸がん検診（便検査）を受けるか決めていますか？**

○ 決めている →（場所 ）

○ 決めていない

**問 3**  
へ進む

**問 3** 大腸がんになることはどのくらい心配ですか？最も当てはまるものを 1つ選んで○を塗りつぶしてください。

全く  
心配していない

○

あまり心配  
していない

○

いくらか  
心配している

○

かなり心配  
している

○

最後にあなた自身のことについてお伺いします。

**問 4** あなたの性別をお伺いします。

- 男性
- 女性

**問 5** あなたの年齢をお伺いします。

- 40代
- 50代
- 60代

**問 6** あなたが最後に卒業された学校は次のうちどれにあたりますか？

- 中学校
- 高等学校
- 短大・専門学校
- 大学・大学院
- その他
- 答えたくない

**問 7** あなたのお宅の暮らしむきは全般的にみて、次のどれにあてはまりますか？

- かなり苦しい
- やや苦しい
- ふつう
- やや余裕がある
- 余裕がある
- 答えたくない

**問 8** あなたには現在、配偶者がいますか？

- いる
- いない

**問 10** あなたはこれまで、腸や肛門などの病気にかかったことがありますか？  
該当する選択肢すべての○を塗りつぶしてください。(複数回答)

- なし
- 大腸ポリープ
- 痔(じ)
- 潰瘍(かいよう)性大腸炎
- 大腸がん
- 答えたくない

**問 9** あなたの直系のご家族(親や子ども、兄弟姉妹など)で、大腸がんと診断された方はいますか？

- はい
- いいえ
- 答えたくない

質問は以上です。記入漏れがないかをご確認の上、同封の返信用封筒に入れ、

**11月13日(土)**までにポストに投函して下さい。

ご協力ありがとうございました。
